# Supplementary material for: Characterisation of Bioactive Peptides from Red Alga Gracilariopsis chorda
Source: MDPI journal article supplement (doi:10.3390/md21010049), 2023-01-11
Supplement: s1 [file s1]

## Supplemental data

(a)

PE- $\alpha$

MKSVITTVISAADAAGRFTSSDLESVQGNIQRAAARLEAAEKLADNHDAVVKEAGDACFAKYSYLKNSGEAGENQEKINKCYRDI DHYMR L INYS  
LVVGGTGPLDEWGIAGAREVYRALNLP TASYVAAFATRDRLCVPRDMSAQAGVEYNSALDYVINSLS

PE- $\beta$

MLDAFSRVVVNSDAKAAYVGGSDLQALKTFIAEGNKRLDAVNSIVSNASCIVTDAVSGMICENPGLISPGGNCYTNRRMAACLRDGEIILRYVSYA  
LLAGDPSVLEDRCNLGLKETIYIALGVPTNSSVRAVSIMKAAAVAFISNTASQRKMDTTS GDCSALSSEIASYCDRVCSAIS

PE- $\gamma$

MDSPAFAVNGMFSVNVGTSSFTKNNVTSQRTTASPAAVRMAVDPFQKQFQSPGKINVDYSRPKKLATYKRSGYSAILDYPTQTS MAGHYSISNCN  
ITSGTKKILMKYDEYCAKGMQVYKRSAPVYGEYTTKCTEGTLPQQA FDKRVFNRTQA FRQAQKP INVRLGEQYENRR LAFIFTNGCHREEQQFKE  
MPMSTATYLAGRSEALGTCYRLVPTTTVAEDYMADSVRSQITQKAHPTGVYRVGVCEDGYAKGAENRRVAALASEFRTSQQSASAITGQQYESAR  
TARKLYASSCHHEETQIYQYPAVAAAMCRD

(b)

PC- $\alpha$

MSIITKSIVNADAEARYLSPGELDRIKSFVLSGQRRRLRIAQILTDNRELIVKQGGQQLFQKRPDVVSPPGNAYGEEMTATCLRDLDYYLRLVTYGI  
VAGDVTPIEEIGLVGVKEMYNSLGTPISGVAEGVRSMKTVACSLLSGEDSAEAGFYFDYTLGAMQ

PC- $\beta$

MQDAITSVINAADVQGGKYLDNSLDKLRGYFQTGELRVRASATIAANAATIIKDSVAKALLYSDITRPGGNMYTTRRYAACIRDLDYLLRYATYGM  
LAGDPSILDERVLNGLKETYNLSGVPIGATIQAIQAMKEVTSNLVGPDAGKEMGVYFDYVCSGLS

(c)

APC- $\alpha$

MSIITKSIVNADAEARYLSPGELDRIKSFVLSGQRRRLRIAQILTDNRELIVKQGGQQLFQKRPDVVSPPGNAYGEEMTATCLRDLDYYLRLVTYGI  
VAGDVTPIEEIGLVGVKEMYNSLGTPISGVAEGVRSMKTVACSLLSGEDSAEAGFYFDYTLGAMQ

APC- $\beta$

MQDAITSVINAADVQGGKYLDNSLDKLRGYFQTGELRVRASATIAANAATIIKDSVAKALLYSDITRPGGNMYTTRRYAACIRDLDYLLRYATYGM  
LAGDPSILDERVLNGLKETYNLSGVPIGATIQAIQAMKEVTSNLVGPDAGKEMGVYFDYVCSGLS

APC- $\gamma$

MSLISQIIVNADNELRYP SIGELQSINSYLKTGEKRINISCI LRDEKEIIQQASKTIFQIHPEYIAPGGNAEGARKRSLCLRDYSWYLRLITYGI  
LAGDKNSIEKIGIIGVREMYNSLGVPIIGMIDAIDCLKKATAEFLNEEIIIVAPYFDFIIQGMS

(d)

RuBisCo-L

MSQSVEERTRIKNERYESGVIPYAKMGYWDPDYVVKD TDVLALFRVSPQPGVDPVEASAAVAGESSTATWTVVWTDLLTACDLYRAKAYKVEAVPN  
TTDQYFAFIAYDIDLFEEGSIANLTASIIIGNVFGFKAVKALRLEDMRIPVAYLKTFQGPATGLVVERERMDKFGRPF LGATVKPKLGLSGKNYGRV  
VYEGKGGDLDFLKDDENINSQPFMRWKERFLYSMEGVNRAIAASGEVKGHYMNITAATMEDMYERAFAKQLGTVIIMIDLVI GYTAIQTMAIWAR  
KNDMILHLHRAGNSTYSRQKIHG M NFRVICKWMMAGVDHIHAGTVVGKLEGDPLMIRGFYNTLLQTHLKVNLPGGIFFEQDWASLRKVTPVASGG  
IHCGQMHQLLDYLGNDVVLQFGGGTIGHPDGIQAGATANRVALESMVMARNEGRDYVAEGPEILRVAAKTCGPLQTALDLWKDITFNYTSTD TADF  
VETPTANV

RuBisCo-S

MFEINSCRKQHSNVYIKVNAFDNTRGTESC VLSFIINRPAYEPGFELVRTEDDSRNQRYSF RSYATAKPEGSR Y

Figure S1a-d: Amino acid sequences of the main WSP of *G. chorda*, namely PE- $\alpha$ , - $\beta$ , and - $\gamma$  (a), PC- $\alpha$  and - $\beta$  (b), APC- $\alpha$ , - $\beta$ , and - $\gamma$  (c), and RuBisCo-L and -S (d).

**Table S1.** Amino acid composition and distribution of *G. chorda* phycobiliproteins and RuBisCo.

| Amino acid                    | PE       |         |          | PC       |         | APC      |         |          | RuBisCo |        |
|-------------------------------|----------|---------|----------|----------|---------|----------|---------|----------|---------|--------|
|                               | $\alpha$ | $\beta$ | $\gamma$ | $\alpha$ | $\beta$ | $\alpha$ | $\beta$ | $\gamma$ | L       | S      |
| Ala                           | 15.3     | 15.3    | 11.3     | 13       | 15.1    | 7.5      | 11.8    | 6.2      | 9.4     | 5.4    |
| Val                           | 5.5      | 8.5     | 6        | 1.9      | 8.2     | 8.1      | 6.2     | 2.5      | 8.2     | 5.4    |
| Met                           | 1.8      | 2.8     | 3.4      | 2.5      | 3.5     | 3.1      | 3.1     | 2.5      | 3.9     | 1.3    |
| Ile                           | 6.1      | 5.6     | 3.1      | 6.8      | 5.8     | 6.8      | 6.8     | 17.4     | 5.7     | 5.4    |
| Leu                           | 8.5      | 8.5     | 3.5      | 8.6      | 9.9     | 9.9      | 9.3     | 8.1      | 7.8     | 2.7    |
| Phe                           | 2.4      | 1.7     | 3.8      | 2.5      | 2.3     | 2.5      | 1.2     | 2.5      | 4.1     | 6.7    |
| Pro                           | 1.8      | 1.7     | 4.1      | 3.7      | 1.7     | 3.1      | 2.5     | 3.1      | 3.7     | 4.1    |
| Try                           | 0.6      | 0.0     | 0.0      | 0.6      | 0.0     | 0.0      | 0.0     | 0.6      | 1.6     | 0.0    |
| Total hydrophobic amino acids | 42.0     | 44.1    | 35.2     | 39.6     | 46.5    | 41.0     | 40.9    | 42.9     | 44.4    | 31.0   |
| Arg                           | 6.1      | 5.6     | 6.9      | 4.3      | 5.8     | 6.2      | 5.6     | 5        | 5.3     | 10.8   |
| Glu                           | 6.1      | 2.8     | 5        | 5.6      | 4.1     | 6.8      | 3.1     | 8.1      | 5.5     | 8.1    |
| Gln + Asn                     | 6.7      | 7.3     | 10.7     | 9.8      | 11.1    | 6.8      | 7.4     | 8.7      | 7.2     | 10.8   |
| Lys                           | 4.3      | 2.8     | 5.6      | 3.7      | 2.9     | 3.7      | 4.4     | 6.2      | 5.1     | 4.1    |
| His                           | 1.2      | 0.0     | 1.6      | 0.6      | 0.0     | 0.0      | 0.0     | 0.6      | 2.0     | 1.4    |
| Asp                           | 6.7      | 6.2     | 3.5      | 2.5      | 5.8     | 5.6      | 8.1     | 4.3      | 6.0     | 4.1    |
| Total hydrophilic amino acids | 31.1     | 24.7    | 33.3     | 26.5     | 29.7    | 29.1     | 28.6    | 32.9     | 31.1    | 39.3   |
| Ser                           | 7.9      | 12.4    | 8.2      | 9.9      | 7.6     | 7.5      | 6.2     | 7.4      | 3.9     | 10.8   |
| Gly                           | 7.9      | 7.4     | 5.7      | 8.0      | 6.4     | 10.6     | 8.7     | 7.4      | 8.8     | 4.0    |
| Thr                           | 3.7      | 4.0     | 8.8      | 8.0      | 5.2     | 5.6      | 6.8     | 2.5      | 6.8     | 5.4    |
| Tyr                           | 5.5      | 3.4     | 6.3      | 6.8      | 2.9     | 5.0      | 7.5     | 5.0      | 4.1     | 6.8    |
| Cys                           | 1.9      | 4.0     | 2.5      | 1.2      | 1.7     | 1.2      | 1.3     | 1.9      | 0.9     | 2.7    |
| Total neutral amino acids     | 26.9     | 31.2    | 31.5     | 33.9     | 23.8    | 29.9     | 30.5    | 24.2     | 24.5    | 29.7   |
| Total aromatic amino acids    | 8.5      | 5.1     | 10.1     | 9.9      | 5.2     | 7.5      | 8.7     | 8.1      | 9.8     | 13.5   |
| pI                            | 5.19     | 5.38    | 9.32     | 6.57     | 5.13    | 4.9      | 5.1     | 5.51     | 6.11    | 8.68   |
| MW in Da                      | 17722.9  | 18333.8 | 35467.9  | 17529.7  | 18294.9 | 17522.0  | 17470.8 | 18133.1  | 54194.1 | 8662.6 |
